# Supplementary material for: Large-scale functional characterization of low-density lipoprotein receptor gene variants improves risk assessment in cardiovascular disease
Source: bioRxiv or medRxiv preprint supplement (doi:10.1101/2023.12.27.23299827), 2023-12-28

**A**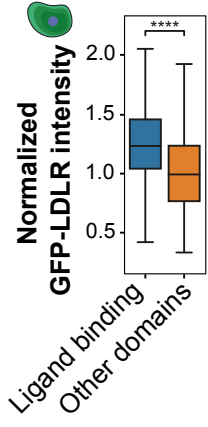**B**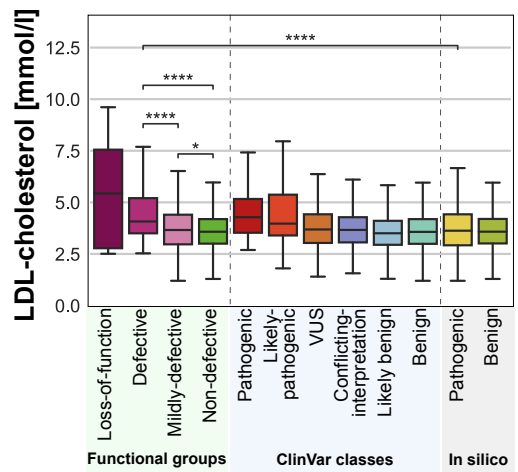**C**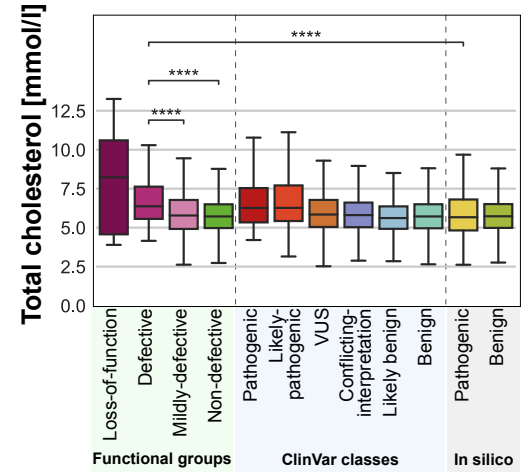**D**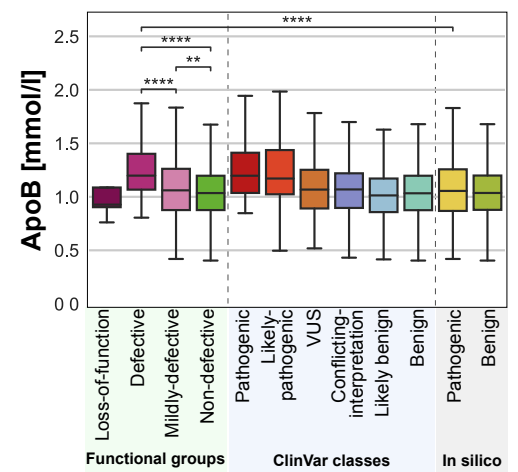**E**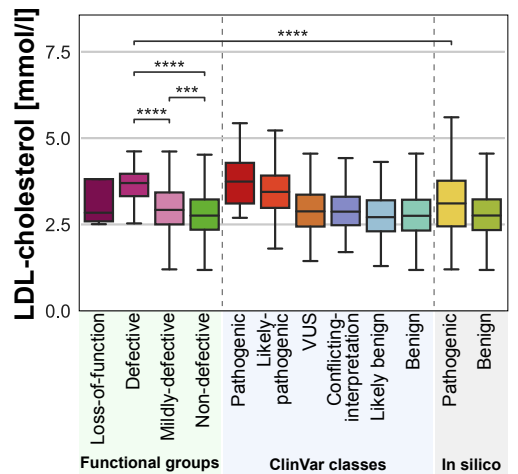**F**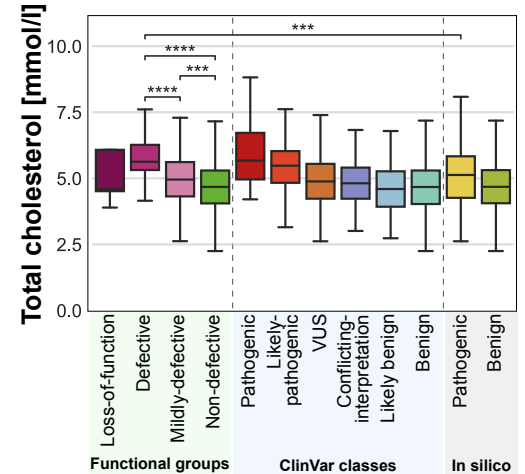**G**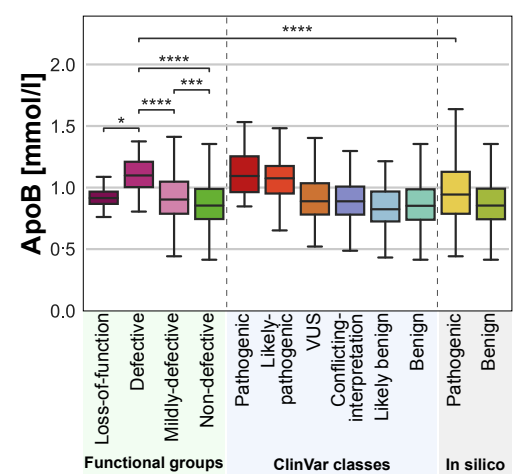**H**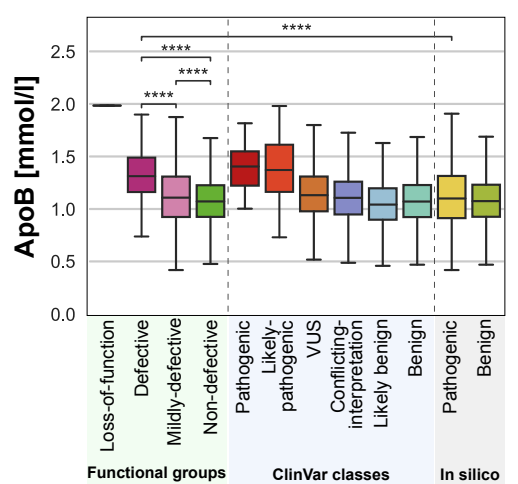

Supplement: Supplementary file [file media-3.pdf]
